# Supplementary material
Source: MDPI journal article supplement (https://www.mdpi.com/2071-1050/2/11/3465)
Supplement: s1 [file s1]

*Correction*

**Correction: John Blewitt. Deschooling Society? A Lifelong Learning Network for Sustainable Communities, Urban Regeneration and Environmental Technologies. *Sustainability* 2010, 2, 3465-3478**

**John Blewitt**

Lifelong Learning Centre, Aston University, Aston Triangle, Birmingham, B4 7ET, UK;

E-Mail: j.d.blewitt@aston.ac.uk; Tel.: +44-121-204-4284

*Received: 25 October 2010 / Published: 12 November 2010*

---

I found an error in my paper published in *Sustainability* 2010 [1]. On page 3473, line 5, the sentence beginning: ‘By the autumn of 2001 ...’ should read, ‘By the autumn of 2010 ...’

**Reference**

1. Blewitt, J. Deschooling Society? A Lifelong Learning Network for Sustainable Communities, Urban Regeneration and Environmental Technologies. *Sustainability* **2010**, *2*, 3465-3478.

© 2010 by the authors; licensee MDPI, Basel, Switzerland. This article is an open access article distributed under the terms and conditions of the Creative Commons Attribution license (<http://creativecommons.org/licenses/by/3.0/>).
